# Supplementary material
Source: PubMed Central journal article supplement (PMC3974348)
Supplement: CJN.01860213_CJN01860213SupplementaryData.pdf [file CJN.01860213_CJN01860213SupplementaryData.pdf]

Supplemental Table 1. Selected SNPs associated with SLE with  $p < 1 \times 10^{-5}$  for the current study

| Chr | SNP        | Gene     | Ref.      | Chr | SNP        | Gene     | Ref.   | Chr | SNP        | Gene       | Ref.   | Chr | SNP        | Gene       | Ref.   |
|-----|------------|----------|-----------|-----|------------|----------|--------|-----|------------|------------|--------|-----|------------|------------|--------|
| 1   | rs16840639 | CFHR3-1Δ | (11)      | 5   | rs3212227  | IL12B    | (1)    | 7   | rs4728142  | IRF5       | (3, 7) | 12  | rs3184504  | SH2B3      | (4, 1) |
| 1   | rs6677604  | CFHR3-1Δ | (11)      | 5   | rs11951576 | POLS     | (2, 1) | 7   | rs1167796  | Intergenic | (2)    | 12  | rs10847697 | SLC15A4    | (3)    |
| 1   | rs1801274  | FCGR2A   | (2, 4)    | 5   | rs2431099  | PTTG1    | (2)    | 7   | rs10239340 | TNPO3      | (4)    | 12  | rs1385374  | SLC15A4    | (3, 7) |
| 1   | rs1874791  | IL12RB2  | (2)       | 5   | rs2431697  | PTTG1    | (8)    | 8   | rs2248932  | BLK        | (3, 4) | 12  | rs428073   | TAOK3      | (2, 1) |
| 1   | rs9782955  | LYST     | (2)       | 5   | rs10036748 | TNIP1    | (3, 7) | 8   | rs2254546  | BLK        | (7)    | 12  | rs497273   | UNQ1887    | (1)    |
| 1   | rs10911363 | NCF2     | (2, 1)    | 6   | rs548234   | ATG5     | (3, 7) | 8   | rs2618476  | BLK        | (8)    | 13  | rs7329174  | ELF1       | (7)    |
| 1   | rs2022013  | NMNAT2   | (2, 4, 1) | 6   | rs573775   | ATG5     | (4)    | 8   | rs2618479  | BLK        | (3)    | 16  | rs7197475  | Intergenic | (7)    |
| 1   | rs2476601  | PTPN22   | (2, 4)    | 6   | rs6568431  | ATG5     | (2, 4) | 8   | rs2736340  | BLK        | (2, 7) | 16  | rs11648084 | IRF8       | (6)    |
| 1   | rs1234315  | TNFSF4   | (3, 10)   | 6   | rs641153   | CFB      | (2, 1) | 8   | rs7812879  | BLK        | (3)    | 16  | rs2280381  | IRF8       | (1)    |
| 1   | rs2205960  | TNFSF4   | (3, 7)    | 6   | rs3131379  | HLA      | (4)    | 8   | rs7836059  | C8orf12    | (4)    | 16  | rs11574637 | ITGAM      | (5)    |
| 1   | rs10798269 | RPL26P11 | (4)       | 6   | rs9501626  | HLA      | (7)    | 8   | rs2667978  | LYN        | (4)    | 16  | rs11860650 | ITGAM      | (2)    |
| 2   | rs1990760  | IFIH1    | (2, 4, 1) | 6   | rs3135394  | HLA-DRB1 | (2)    | 8   | rs7829816  | LYN        | (2,    | 16  | rs9888739  | ITGAM      | (4)    |

|   |            |         |              |   |            |          |           |    |            |            |        |    |           |             |           |
|---|------------|---------|--------------|---|------------|----------|-----------|----|------------|------------|--------|----|-----------|-------------|-----------|
|   |            |         |              |   |            |          |           |    |            | 4)         |        |    |           |             |           |
| 2 | rs13385731 | RASGRP3 | (3, 7)       | 6 | rs9271366  | HLA-DRB1 | (2, 7)    | 8  | rs11783247 | XKR6       | (4)    | 16 | rs9937837 | ITGAM       | (5)       |
| 2 | rs10168266 | STAT4   | (7)          | 6 | rs2230926  | TNFAIP3  | (3, 7)    | 8  | rs4240671  | XKR6       | (4)    | 17 | rs8076347 | IKZF3       | (6)       |
| 2 | rs7574865  | STAT4   | (3, 4, 7)    | 6 | rs5029937  | TNFAIP3  | (2)       | 8  | rs6984496  | XKR6       | (4)    | 17 | rs8079075 | IKZF3       | (6)       |
| 2 | rs7601754  | STAT4   | (4)          | 6 | rs5029939  | TNFAIP3  | (2)       | 8  | rs6985109  | XKR6       | (4)    | 17 | rs9913957 | IKZF3       | (6)       |
| 3 | rs6438700  | CD86    | (2, 1)       | 6 | rs6920220  | TNFAIP3  | (2)       | 8  | rs6601327  | Intergenic | (4)    | 17 | rs1453560 | ZPBP2       | (6)       |
| 3 | rs485499   | IL12A   | (6)          |   | rs1861525  | CYCS     | (2, 1)    | 10 | rs1913517  | WDFY4      | (7)    | 19 | rs280519  | TYK2        | (2, 4, 1) |
| 3 | rs669003   | IL12A   | (6)          | 7 | rs6964720  | HIP1     | (7)       | 10 | rs7922169  | WDFY4      | (7)    | 22 | rs2071725 | SCUBE1      | (2, 4)    |
| 3 | rs2176082  | PXK     | (2)          | 7 | rs10156091 | ICA1     | (2, 4, 1) | 10 | rs877819   | WDFY4      | (7)    | 22 | rs131654  | UBE2L3      | (2)       |
| 3 | rs6445975  | PXK     | (4, 7, 1)    | 7 | rs4917014  | IKZF1    | (3, 7)    | 11 | rs6590330  | ETS1       | (7)    | 22 | rs463426  | UBE2L3      | (2, 7)    |
| 3 | rs1132200  | TMEM39A | (6)          | 7 | rs10488631 | IRF5     | (8)       | 11 | rs4639966  | Intergenic | (7)    | 22 | rs5754217 | UBE2L3      | (2, 4)    |
| 4 | rs340630   | AFF1    | (7)          | 7 | rs12537284 | IRF5     | (4)       | 11 | rs4963128  | KIAA1542   | (4, 7) | 23 | rs2269368 | IRAK1-MECP2 | (2)       |
| 4 | rs10516487 | BANK1   | (2, 8, 7, 1) | 7 | rs2070197  | IRF5     | (2)       | 12 | rs17696736 | SH2B3      | (2)    | 23 | rs3853839 | TLR7        | (9)       |

Chr, chromosome; SLE, systemic lupus erythematosus; SNP, single nucleotide polymorphism; Ref, reference

Supplemental Table 2 Gene–gene interactions among identified IgAN loci according to SNP combinations

| Interaction                       | PXK* HLA-DRA number<br>(cases/controls %) | CFH* HLA-DRB1                            | HLA-DRA* HLA-DRB1                        |
|-----------------------------------|-------------------------------------------|------------------------------------------|------------------------------------------|
| SNP*SNP                           | rs6445961* rs9501626                      | rs6677604* rs9271366                     | rs9501626* rs9271366                     |
| <i>Additive interaction</i>       |                                           |                                          |                                          |
| 0-0 (Ref.)                        | 72(6.04)/18(2.00)                         | 851(71.27)/525(58.27)                    | 853(71.44)/532(59.05)                    |
| 0-1                               | 15(1.26)/18(2.00)<br>0.21(0.09–0.49)      | 247(20.69)/253(28.08)<br>0.60(0.49–0.74) | 90(7.54)/101(11.21)<br>0.56(0.41–0.75)   |
| 1-0                               | 870(72.92)/615(68.18)<br>0.35(0.21–0.60)  | 80(6.70)/67(7.44)<br>0.74(0.52–1.04)     | 78(6.53)/60(6.66)<br>0.81(0.57–1.16)     |
| 1-1                               | 236(19.78)/250(27.72)<br>0.24(0.14–0.41)  | 16(1.34)/56(6.21)<br>0.18(0.10–0.31)     | 173(14.49)/208(23.08)<br>0.52(0.41–0.65) |
| AP                                | 2.86(0.55–5.16)                           | –0.92(–2.85–1.01)                        | 0.29(–0.36–0.95)                         |
| RERI                              | 0.67(0.45–0.90)                           | –0.16(–0.47–0.14)                        | 0.15(–0.19–0.49)                         |
| Synergy Index                     | 0.53(0.47–0.60)                           | 1.25(0.78–1.97)                          | 0.76(0.43–1.32)                          |
| p for interaction                 | <b>1.51×10<sup>-2</sup></b>               | 0.35                                     | 0.38                                     |
| <i>Multiplicative interaction</i> |                                           |                                          |                                          |

|                   |                       |                       |                       |
|-------------------|-----------------------|-----------------------|-----------------------|
| p for interaction | $6.70 \times 10^{-2}$ | $1.77 \times 10^{-2}$ | $3.23 \times 10^{-2}$ |
|-------------------|-----------------------|-----------------------|-----------------------|

0-0 indicates no protective allele combination; 0-1 and 1-0 indicate one with a protective allele but not with the other one; 1-1 indicates both with the protective allele.

These measures are defined as follows:

$$RERI = RR_{11} - RR_{10} - RR_{01} + 1,$$

$$AP = RERI / RR_{11},$$

$$SI = [RR_{11} - 1] / [(RR_{10} - 1) + (RR_{01} - 1)]$$

RERI, relative excess risk due to interaction; AP, attributable proportion due to interaction; and SI, the synergy index

Referent group = group with G(-) and G(-), G(-)with no protective allele.

RR<sub>11</sub> = Risk of disease in G(+)/G(+) group/Risk in reference group

RR<sub>10</sub> = Risk of disease in G(+)/G(-) group/Risk in reference group

RR<sub>01</sub> = Risk of disease in G(-)/G(+) group/Risk in reference group

If there is no biological interaction, RERI and AP = 0 and SI = 1.

Sup. Table 3 Differential gene-expression analyses of genes linked with identified novel IgAN loci.

| Candidate gene | Samples                        |            |                             |                                |            |                             |                                |                  |                             |
|----------------|--------------------------------|------------|-----------------------------|--------------------------------|------------|-----------------------------|--------------------------------|------------------|-----------------------------|
|                | Renal biopsies                 |            |                             |                                |            |                             | Whole blood                    |                  |                             |
|                | <u>Experiment E-GEOD-37460</u> |            |                             | <u>Experiment E-GEOD-35489</u> |            |                             | <u>Experiment E-GEOD-14795</u> |                  |                             |
| IgAN (n=27)    | Controls (n=27)                | p          | IgAN (n=25)                 | Controls (n=6)                 | p          | IgAN (n=12)                 | Controls (n=8)                 | p                |                             |
| <i>ADM</i>     | 11.38±0.61                     | 10.98±0.55 | <b>1.37×10<sup>-2</sup></b> | 8.17±0.62                      | 9.25±0.72  | <b>1.12×10<sup>-2</sup></b> | 1201.27±659.99                 | 1125.89±233.29   | 0.72                        |
| <i>BARD</i>    | 5.52±0.30                      | 5.41±0.33  | 0.25                        | 5.11±0.20                      | 5.04±0.19  | 0.50                        | 171.54±89.96                   | 200.15±124.92    | 0.56                        |
| <i>BCL2</i>    | 6.29±0.17                      | 6.56±0.42  | <b>3.12×10<sup>-3</sup></b> | 5.97±0.13                      | 5.94±0.04  | 0.54                        | 59.13±52.51                    | 102.51±100.64    | 0.22                        |
| <i>BCR</i>     | 7.75±0.36                      | 7.81±0.30  | 0.45                        | 7.42±0.24                      | 7.34±0.21  | 0.43                        | 877.31±245.42                  | 768.40±129.32    | 0.27                        |
| <i>BRCA</i>    | 4.14±0.12                      | 4.24±0.32  | 0.17                        | 3.84±0.08                      | 3.88±0.09  | 0.25                        | 57.50±70.43                    | 62.38±53.80      | 0.87                        |
| <i>C3</i>      | 9.18±1.64                      | 7.90±0.66  | <b>6.11×10<sup>-4</sup></b> | 8.69±1.42                      | 7.39±0.22  | <b>1.54×10<sup>-4</sup></b> | 153.79±144.84                  | 68.25±42.59      | 0.13                        |
| <i>CBL</i>     | 6.13±0.20                      | 6.20±0.25  | 0.32                        | 5.14±0.17                      | 5.25±0.18  | 0.19                        | 214.39±171.89                  | 84.91±39.13      | <b>2.63×10<sup>-2</sup></b> |
| <i>CD1D</i>    | 4.91±0.44                      | 4.71±0.37  | 0.08                        | 4.20±0.11                      | 4.18±0.11  | 0.70                        | 751.28±205.60                  | 721.90±185.35    | 0.74                        |
| <i>CD38</i>    | 6.76±0.33                      | 6.60±0.33  | 0.10                        | 6.34±0.23                      | 6.31±0.11  | 0.80                        | 301.85±243.29                  | 304.39±136.90    | 0.98                        |
| <i>CD63</i>    | 13.12±0.22                     | 12.92±0.21 | <b>1.40×10<sup>-3</sup></b> | 11.59±0.24                     | 11.38±0.08 | <b>1.07×10<sup>-3</sup></b> | 5830.54±999.47                 | 5154.65±983.69   | 0.15                        |
| <i>CD74</i>    | 11.38±0.21                     | 11.14±0.77 | 0.13                        | 10.09±0.57                     | 9.31±0.25  | <b>6.69×10<sup>-5</sup></b> | 13744.27±3366.53               | 14337.47±2729.72 | 0.68                        |
| <i>CD79A</i>   | 6.15±0.28                      | 6.24±0.34  | 0.29                        | 5.71±0.17                      | 5.78±0.16  | 0.40                        | 1463.41±460.23                 | 1581.10±584.93   | 0.62                        |
| <i>CD79B</i>   | 6.85±0.41                      | 6.52±0.36  | <b>3.42×10<sup>-3</sup></b> | 5.26±0.15                      | 5.26±0.15  | 0.95                        | 876.31±260.02                  | 717.94±181.27    | 0.15                        |
| <i>CRP</i>     | 4.63±0.09                      | 4.76±0.27  | <b>2.39×10<sup>-2</sup></b> | 4.42±0.10                      | 4.48±0.05  | 0.22                        | 61.40±53.58                    | 31.40±9.75       | 0.08                        |
| <i>CTAG1B</i>  |                                |            |                             |                                |            |                             | 68.15±52.89                    | 46.99±16.15      | 0.22                        |
| <i>DMP1</i>    | 4.07±0.08                      | 4.17±0.26  | 0.06                        | 3.72±0.07                      | 3.79±0.08  | <b>3.67×10<sup>-2</sup></b> | 16.44±52.89                    | 14.06±6.48       | 0.75                        |
| <i>E2F4</i>    | 9.13±0.18                      | 9.25±0.25  | 0.06                        | 8.56±0.12                      | 8.64±0.13  | 0.14                        | 1772.88±238.87                 | 1769.45±390.65   | 0.98                        |
| <i>EGFR</i>    | 7.16±0.16                      | 7.41±0.28  | <b>2.14×10<sup>-4</sup></b> | 6.88±0.13                      | 6.95±0.21  | 0.27                        | 47.52±59.34                    | 77.06±70.79      | 0.33                        |
| <i>ERBB2</i>   | 6.95±0.26                      | 7.13±0.33  | <b>3.02×10<sup>-2</sup></b> | 7.43±0.17                      | 7.36±0.12  | 0.38                        | 46.25±27.77                    | 69.28±84.47      | 0.39                        |
| <i>FCGR2A</i>  |                                |            |                             |                                |            |                             | 6647.87±2323.91                | 6323.33±1951.18  | 0.75                        |

|                 |            |            |                                         |            |            |                                         |                  |                  |                                         |
|-----------------|------------|------------|-----------------------------------------|------------|------------|-----------------------------------------|------------------|------------------|-----------------------------------------|
| <i>FCGR2B</i>   | 5.92±0.79  | 5.42±0.36  | <b><math>4.14 \times 10^{-3}</math></b> | 5.27±0.38  | 5.17±0.18  | 0.52                                    | 497.32±330.72    | 574.34±262.31    | 0.89                                    |
| <i>HLA-DMA</i>  | 10.83±0.25 | 10.30±0.44 | <b><math>2.37 \times 10^{-6}</math></b> | 8.45±0.64  | 7.84±0.14  | <b><math>1.56 \times 10^{-4}</math></b> | 2984.39±700.02   | 2617.08±410.23   | 0.20                                    |
| <i>HLA-DMB</i>  | 10.78±0.40 | 10.15±0.44 | <b><math>1.62 \times 10^{-6}</math></b> | 8.05±0.52  | 7.65±0.13  | <b><math>1.79 \times 10^{-3}</math></b> | 3308.06±514.76   | 2713.27±972.99   | 0.15                                    |
| <i>HLA-DRB3</i> |            |            |                                         |            |            |                                         | 16548.89±4833.56 | 15362.38±4639.16 | 0.60                                    |
| <i>HLA-DRB5</i> |            |            |                                         |            |            |                                         | 380.64±246.37    | 455.47±118.39    | 0.44                                    |
| <i>CFI</i>      | 9.78±0.84  | 9.94±0.51  | 0.41                                    | 10.52±0.24 | 10.15±0.10 | <b><math>1.11 \times 10^{-3}</math></b> | 72.60±48.33      | 62.37±37.08      | 0.62                                    |
| <i>ITGAM</i>    | 7.21±0.80  | 6.42±0.66  | <b><math>2.15 \times 10^{-4}</math></b> | 4.73±0.24  | 4.67±0.15  | 0.59                                    | 275.50±134.79    | 222.10±143.77    | 0.41                                    |
| <i>CD82</i>     | 7.77±0.23  | 7.77±0.18  | 1.00                                    | 7.05±0.17  | 7.06±0.11  | 0.95                                    | 804.37±319.90    | 829.77±282.34    | 0.86                                    |
| <i>SMAD4</i>    | 7.94±0.42  | 8.21±0.46  | <b><math>2.54 \times 10^{-2}</math></b> | 6.44±0.31  | 6.34±0.11  | 0.43                                    | 130.18±76.89     | 64.09±50.85      | <b><math>4.72 \times 10^{-2}</math></b> |
| <i>SMAD7</i>    | 8.83±0.36  | 8.45±0.38  | <b><math>3.65 \times 10^{-4}</math></b> | 6.65±0.30  | 7.22±0.16  | <b><math>1.17 \times 10^{-4}</math></b> | 269.09±111.03    | 299.50±146.37    | 0.60                                    |
| <i>MAX</i>      | 7.65±0.13  | 7.63±0.25  | 0.68                                    | 7.52±0.08  | 7.49±0.09  | 0.53                                    | 537.63±303.02    | 506.51±142.20    | 0.79                                    |
| <i>MBP</i>      | 6.72±0.17  | 6.81±0.14  | <b><math>4.12 \times 10^{-2}</math></b> | 5.96±0.20  | 6.10±0.24  | 0.13                                    | 699.51±282.94    | 759.65±264.70    | 0.64                                    |
| <i>MYC</i>      | 7.25±0.64  | 7.43±0.89  | 0.38                                    | 7.49±0.61  | 8.29±0.37  | <b><math>4.68 \times 10^{-3}</math></b> | 789.59±336.65    | 1062.07±273.45   | 0.07                                    |
| <i>NEDD4</i>    | 7.96±0.35  | 7.72±0.38  | <b><math>2.23 \times 10^{-2}</math></b> | 7.00±0.27  | 6.88±0.11  | 0.31                                    | 156.95±149.66    | 150.86±96.96     | 0.92                                    |
| <i>PARK2</i>    | 5.26±0.11  | 5.61±0.47  | <b><math>1.17 \times 10^{-3}</math></b> | 5.87±0.18  | 5.94±0.06  | 0.38                                    | 125.53±106.04    | 107.97±69.02     | 0.69                                    |
| <i>PLCG2</i>    | 11.03±1.03 | 11.25±1.12 | 0.47                                    | 9.47±0.32  | 9.45±0.28  | 0.90                                    | 2650.25±308.66   | 2650.90±446.61   | 1.00                                    |
| <i>PTEN</i>     | 7.20±0.35  | 6.87±0.28  | <b><math>3.90 \times 10^{-4}</math></b> | 6.62±0.18  | 6.45±0.05  | <b><math>2.57 \times 10^{-4}</math></b> | 1499.32±473.55   | 1879.45±288.41   | <b><math>3.89 \times 10^{-2}</math></b> |
| <i>PARC</i>     | 4.78±0.50  | 4.52±0.30  | <b><math>2.31 \times 10^{-2}</math></b> | 4.20±0.15  | 4.13±0.06  | 0.30                                    | 174.82±84.23     | 162.63±74.85     | 0.75                                    |
| <i>SELL</i>     | 7.49±0.91  | 7.26±0.97  | 0.35                                    | 5.44±0.29  | 5.58±0.19  | 0.27                                    | 19529.63±4906.52 | 21071.23±6755.84 | 0.56                                    |
| <i>AURKA</i>    | 6.32±0.52  | 5.95±0.29  | <b><math>2.04 \times 10^{-3}</math></b> | 4.91±0.18  | 4.74±0.07  | <b><math>3.08 \times 10^{-2}</math></b> | 103.36±59.43     | 84.17±56.00      | 0.48                                    |
| <i>TAFI</i>     | 6.21±0.18  | 6.51±0.43  | <b><math>2.09 \times 10^{-3}</math></b> | 6.94±0.22  | 7.04±0.27  | 0.32                                    | 381.02±99.49     | 378.81±110.97    | 0.96                                    |
| <i>TRA</i>      |            |            |                                         |            |            |                                         | 4280.94±1262.13  | 4182.18±1334.01  | 0.87                                    |
| <i>TRB</i>      |            |            |                                         |            |            |                                         | 10608.57±2815.05 | 10375.70±3128.35 | 0.86                                    |
| <i>THBS1</i>    | 8.17±0.30  | 8.45±0.35  | <b><math>3.08 \times 10^{-3}</math></b> | 8.00±0.27  | 8.06±0.27  | 0.57                                    | 37.76±18.98      | 30.66±10.08      | 0.35                                    |
| <i>UBA1</i>     | 10.55±0.36 | 10.80±0.60 | 0.07                                    | 9.56±0.20  | 9.40±0.19  | 0.08                                    | 2648.89±644.43   | 2582.77±481.57   | 0.81                                    |
| <i>UBE3A</i>    | 8.12±0.15  | 8.22±0.17  | <b><math>2.43 \times 10^{-2}</math></b> | 6.56±0.10  | 6.58±0.09  | 0.69                                    | 549.28±178.33    | 686.08±231.56    | 0.15                                    |

|                 |           |           |                                    |           |           |                             |                |                |      |
|-----------------|-----------|-----------|------------------------------------|-----------|-----------|-----------------------------|----------------|----------------|------|
| <i>ZAP70</i>    | 5.44±0.21 | 5.28±0.18 | <b><u>2.92×10<sup>-3</sup></u></b> | 4.59±0.21 | 4.51±0.18 | 0.41                        | 1009.06±257.97 | 1041.08±314.32 | 0.81 |
| <i>EIF4E2</i>   | 9.06±0.32 | 8.55±0.29 | <b><u>1.01×10<sup>-7</sup></u></b> | 7.58±0.26 | 7.50±0.22 | 0.51                        | 572.30±229.39  | 572.36±132.99  | 1.00 |
| <i>PDIA4</i>    | 9.08±0.19 | 8.73±0.20 | <b><u>2.16×10<sup>-8</sup></u></b> | 7.15±0.19 | 6.64±0.19 | <b>3.59×10<sup>-4</sup></b> | 549.55±139.67  | 560.36±153.08  | 0.88 |
| <i>CTR9</i>     | 8.94±0.31 | 9.04±0.32 | 0.31                               | 7.60±0.25 | 7.54±0.24 | 0.57                        | 330.76±192.87  | 465.83±214.25  | 0.16 |
| <i>RNF144A</i>  | 8.80±0.33 | 8.44±0.31 | <b><u>1.30×10<sup>-4</sup></u></b> | 6.20±0.19 | 6.18±0.09 | 0.77                        | 221.17±143.05  | 289.51±138.67  | 0.30 |
| <i>BCAS2</i>    | 9.38±0.24 | 9.50±0.30 | 0.11                               | 8.53±0.20 | 8.64±0.19 | 0.22                        | 611.30±152.41  | 634.24±105.79  | 0.72 |
| <i>ARIH2</i>    | 7.46±0.13 | 7.49±0.10 | 0.30                               | 6.46±0.07 | 6.52±0.11 | 0.13                        | 232.06±138.98  | 183.63±125.90  | 0.44 |
| <i>UBOX5</i>    | 7.61±0.20 | 7.90±0.36 | <b><u>6.61×10<sup>-4</sup></u></b> | 7.32±0.17 | 7.36±0.10 | 0.61                        | 472.66±114.33  | 534.15±212.27  | 0.41 |
| <i>NEDD4L</i>   | 8.25±0.30 | 8.58±0.27 | <b><u>7.56×10<sup>-5</sup></u></b> | 8.43±0.17 | 8.37±0.24 | 0.44                        | 318.12±166.71  | 305.49±86.61   | 0.85 |
| <i>ARIH1</i>    | 7.65±0.27 | 7.56±0.29 | 0.23                               | 6.46±0.07 | 6.52±0.11 | 0.16                        | 254.49±137.86  | 231.43±119.06  | 0.70 |
| <i>RNF19A</i>   | 6.83±0.25 | 6.80±0.40 | 0.74                               | 5.14±0.24 | 5.12±0.19 | 0.79                        | 286.60±194.32  | 194.21±125.35  | 0.25 |
| <i>RNF216</i>   | 6.75±0.15 | 6.75±0.20 | 0.94                               | 5.53±0.08 | 5.54±0.09 | 0.89                        | 566.23±134.98  | 547.68±155.88  | 0.78 |
| <i>CCNB1IP1</i> | 8.77±0.36 | 9.08±0.25 | <b><u>6.68×10<sup>-4</sup></u></b> | 8.79±0.32 | 8.94±0.16 | 0.28                        | 286.19±98.22   | 280.42±113.80  | 0.91 |
| <i>SMURF2</i>   | 7.85±0.30 | 7.67±0.34 | <b><u>4.83×10<sup>-2</sup></u></b> | 7.34±0.24 | 7.49±0.33 | 0.21                        | 546.83±212.93  | 502.74±163.63  | 0.63 |

Only genes that could be retrieved in the database are shown.

p<0.05 are marked in bold, and those still significant after multiple corrections using Benjamini and Hochberg false discovery rate methods underlined.

Data are the mean ± SD.

## References:

1. Cunninghame, GD, Morris, DL, Bhangale, TR, Criswell, LA, Syvanen, AC, Ronnblom, L, Behrens, TW, Graham, RR & Vyse, TJ: Association of NCF2, IKZF1, IRF8, IFIH1, and TYK2 with systemic lupus erythematosus. *PLoS Genet*, 7: e1002341, 2011.
2. Gateva, V, Sandling, JK, Hom, G, Taylor, KE, Chung, SA, Sun, X, Ortmann, W, Kosoy, R, Ferreira, RC, Nordmark, G, Gunnarsson, I, Svenungsson, E, Padyukov, L, Sturfelt, G, Jonsen, A, Bengtsson, AA, Rantapaa-Dahlqvist, S, Baechler, EC, Brown, EE, Alarcon, GS, Edberg, JC, Ramsey-Goldman, R, McGwin, GJ, Reveille, JD, Vila, LM, Kimberly, RP, Manzi, S, Petri, MA, Lee, A, Gregersen, PK, Seldin, MF, Ronnblom, L, Criswell, LA, Syvanen, AC, Behrens, TW & Graham, RR: A large-scale

replication study identifies TNIP1, PRDM1, JAZF1, UHRF1BP1 and IL10 as risk loci for systemic lupus erythematosus. *Nat Genet*, 41: 1228-33, 2009.

3. Han, JW, Zheng, HF, Cui, Y, Sun, LD, Ye, DQ, Hu, Z, Xu, JH, Cai, ZM, Huang, W, Zhao, GP, Xie, HF, Fang, H, Lu, QJ, Xu, JH, Li, XP, Pan, YF, Deng, DQ, Zeng, FQ, Ye, ZZ, Zhang, XY, Wang, QW, Hao, F, Ma, L, Zuo, XB, Zhou, FS, Du WH, Cheng, YL, Yang, JQ, Shen, SK, Li, J, Sheng, YJ, Zuo, XX, Zhu, WF, Gao, F, Zhang, PL, Guo, Q, Li, B, Gao, M, Xiao, FL, Quan, C, Zhang, C, Zhang, Z, Zhu, KJ, Li, Y, Hu, DY, Lu, WS, Huang, JL, Liu, SX, Li, H, Ren, YQ, Wang, ZX, Yang, CJ, Wang, PG, Zhou, WM, Lv, YM, Zhang, AP, Zhang, SQ, Lin, D, Li, Y, Low, HQ, Shen, M, Zhai, ZF, Wang, Y, Zhang, FY, Yang, S, Liu, JJ & Zhang, XJ: Genome-wide association study in a Chinese Han population identifies nine new susceptibility loci for systemic lupus erythematosus. *Nat Genet*, 41: 1234-7, 2009.

4. Harley, JB, Alarcon-Riquelme, ME, Criswell, LA, Jacob, CO, Kimberly, RP, Moser, KL, Tsao, BP, Vyse, TJ, Langefeld, CD, Nath, SK, Guthridge, JM, Cobb, BL, Mirel, DB, Marion, MC, Williams, AH, Divers, J, Wang, W, Frank, SG, Namjou, B, Gabriel, SB, Lee, AT, Gregersen, PK, Behrens, TW, Taylor, KE, Fernando, M, Zidovetzki, R, Gaffney, PM, Edberg, JC, Rioux, JD, Ojwang, JO, James, JA, Merrill, JT, Gilkeson, GS, Seldin, MF, Yin, H, Baechler, EC, Li, QZ, Wakeland, EK, Bruner, GR, Kaufman, KM & Kelly, JA: Genome-wide association scan in women with systemic lupus erythematosus identifies susceptibility variants in ITGAM, PXX, KIAA1542 and other loci. *Nat Genet*, 40: 204-10, 2008.

5. Hom, G, Graham, RR, Modrek, B, Taylor, KE, Ortmann, W, Garnier, S, Lee, AT, Chung, SA, Ferreira, RC, Pant, PV, Ballinger, DG, Kosoy, R, Demirci, FY, Kamboh, MI, Kao, AH, Tian, C, Gunnarsson, I, Bengtsson, AA, Rantapaa-Dahlqvist, S, Petri, M, Manzi, S, Seldin, MF, Ronnblom, L, Syvanen, AC, Criswell, LA, Gregersen, PK & Behrens, TW: Association of systemic lupus erythematosus with C8orf13-BLK and ITGAM-ITGAX. *N Engl J Med*, 358: 900-9, 2008.

6. Lessard, CJ, Adrianto, I, Ice, JA, Wiley, GB, Kelly, JA, Glenn, SB, Adler, AJ, Li, H, Rasmussen, A, Williams, AH, Ziegler, J, Comeau, ME, Marion, M, Wakeland, BE, Liang, C, Ramos, PS, Grundahl, KM, Gallant, CJ, Alarcon-Riquelme, ME, Alarcon, GS, Anaya, JM, Bae, SC, Boackle, SA, Brown, EE, Chang, DM, Cho, SK, Criswell, LA, Edberg, JC, Freedman, BI, Gilkeson, GS, Jacob, CO, James, JA, Kamen, DL, Kimberly, RP, Kim, JH, Martin, J, Merrill, JT, Niewold, TB, Park, SY, Petri, MA, Pons-Estel, BA, Ramsey-Goldman, R, Reveille, JD, Scofield, RH, Song, YW, Stevens, AM, Tsao, BP, Vila, LM, Vyse, TJ, Yu, CY, Guthridge, JM, Kaufman, KM, Harley, JB, Wakeland, EK, Langefeld, CD, Gaffney, PM, Montgomery, CG & Moser, KL: Identification of IRF8, TMEM39A, and IKZF3-ZPBP2 as susceptibility loci for systemic lupus erythematosus in a large-scale multiracial replication study. *Am J Hum Genet*, 90: 648-60, 2012.

7. Okada, Y, Shimane, K, Kochi, Y, Tahira, T, Suzuki, A, Higasa, K, Takahashi, A, Horita, T, Atsumi, T, Ishii, T, Okamoto, A, Fujio, K, Hirakata, M, Amano, H, Kondo, Y, Ito, S, Takada, K, Mimori, A, Saito, K, Kamachi, M, Kawaguchi, Y, Ikari, K, Mohammed, OW, Matsuda, K, Terao, C, Ohmura, K, Myouzen, K, Hosono, N, Tsunoda, T, Nishimoto, N, Mimori, T, Matsuda, F, Tanaka, Y, Sumida, T, Yamanaka, H, Takasaki, Y, Koike, T, Horiuchi, T, Hayashi, K, Kubo, M, Kamatani, N, Yamada, R, Nakamura, Y & Yamamoto, K: A genome-wide association study identified AFF1 as a susceptibility locus for systemic lupus erythematosus in Japanese. *PLoS Genet*, 8: e1002455, 2012.

8. Ramos, PS, Criswell, LA, Moser, KL, Comeau, ME, Williams, AH, Pajewski, NM, Chung, SA, Graham, RR, Zidovetzki, R, Kelly, JA, Kaufman, KM, Jacob, CO, Vyse,



TJ, Tsao, BP, Kimberly, RP, Gaffney, PM, Alarcon-Riquelme, ME, Harley, JB & Langefeld, CD: A comprehensive analysis of shared loci between systemic lupus erythematosus (SLE) and sixteen autoimmune diseases reveals limited genetic overlap. *PLoS Genet*, 7: e1002406, 2011.

9. Shen, N, Fu, Q, Deng, Y, Qian, X, Zhao, J, Kaufman, KM, Wu, YL, Yu, CY, Tang, Y, Chen, JY, Yang, W, Wong, M, Kawasaki, A, Tsuchiya, N, Sumida, T, Kawaguchi, Y, Howe, HS, Mok, MY, Bang, SY, Liu, FL, Chang, DM, Takasaki, Y, Hashimoto, H, Harley, JB, Guthridge, JM, Grossman, JM, Cantor, RM, Song, YW, Bae, SC, Chen, S, Hahn, BH, Lau, YL & Tsao, BP: Sex-specific association of X-linked Toll-like receptor 7 (TLR7) with male systemic lupus erythematosus. *Proc Natl Acad Sci U S A*, 107: 15838-43, 2010.

10. Yang, W, Shen, N, Ye, DQ, Liu, Q, Zhang, Y, Qian, XX, Hiranakarn, N, Ying, D, Pan, HF, Mok, CC, Chan, TM, Wong, RW, Lee, KW, Mok, MY, Wong, SN, Leung, AM, Li, XP, Avihingsanon, Y, Wong, CM, Lee, TL, Ho, MH, Lee, PP, Chang, YK, Li, PH, Li, RJ, Zhang, L, Wong, WH, Ng, IO, Lau, CS, Sham, PC & Lau, YL: Genome-wide association study in Asian populations identifies variants in ETS1 and WDFY4 associated with systemic lupus erythematosus. *PLoS Genet*, 6: e1000841, 2010.

11. Zhao, J, Wu, H, Khosravi, M, Cui, H, Qian, X, Kelly, JA, Kaufman, KM, Langefeld, CD, Williams, AH, Comeau, ME, Ziegler, JT, Marion, MC, Adler, A, Glenn, SB, Alarcon-Riquelme, ME, Pons-Estel, BA, Harley, JB, Bae, SC, Bang, SY, Cho, SK, Jacob, CO, Vyse, TJ, Niewold, TB, Gaffney, PM, Moser, KL, Kimberly, RP, Edberg, JC, Brown, EE, Alarcon, GS, Petri, MA, Ramsey-Goldman, R, Vila, LM, Reveille, JD, James, JA, Gilkeson, GS, Kamen, DL, Freedman, BI, Anaya, JM, Merrill, JT, Criswell, LA, Scofield, RH, Stevens, AM, Guthridge, JM, Chang, DM, Song, YW, Park, JA, Lee, EY, Boackle, SA, Grossman, JM, Hahn, BH, Goodship, TH, Cantor, RM, Yu, CY, Shen, N & Tsao, BP: Association of genetic variants in complement factor H and factor H-related genes with systemic lupus erythematosus susceptibility. *PLoS Genet*, 7: e1002079, 2011.
